# Supplementary material
Source: publisher figshare collection journal article supplement (https://acs.figshare.com/ndownloader/files/16337228)
Supplement: Supplementary file 1 [file 16337228]

## SUPPORTING INFORMATION

### Mössbauerite as Iron-only Layered Oxyhydroxide Catalyst for WO<sub>3</sub> Photoanodes

Michael Ertl<sup>†,a</sup>, Zili Ma<sup>‡,a</sup>, Thomas Thersleff<sup>§</sup>, Pengbo Lyu<sup>⊥</sup>, Sven Huettnner<sup>||</sup>, Petr Nachtigall<sup>⊥</sup>, Josef Breu<sup>†,\*</sup>, and Adam Slabon<sup>§,\*</sup>

<sup>†</sup>Bavarian Polymer Institute and Department of Chemistry, University of Bayreuth, Universitätsstraße 30, D-95440, Germany

<sup>‡</sup>Institute of Inorganic Chemistry, RWTH Aachen University, Landoltweg 1, D-52056 Aachen, Germany

<sup>||</sup>Organic and Hybrid Electronics, University of Bayreuth, Universitätsstraße 30, D-95440, Germany

<sup>⊥</sup>Department of Physical and Macromolecular Chemistry, Faculty of Sciences, Charles University, Hlavova 8, 128 43 Prague 2, Czech Republic

<sup>§</sup>Department of Materials and Environmental Chemistry, Stockholm University, Svante Arrhenius väg 16 C, 106 91 Stockholm, Sweden

<sup>a</sup>M.E. and Z.M. contributed equally.

#### Table of Content

**Figure S1.** Powder X-ray diffraction data of WO<sub>3</sub>.

**Figure S2.** Open-circuit photovoltage of WO<sub>3</sub> and WO<sub>3</sub>/Mössbauerite photoanodes.

**Figure S3.** LSV at a scan rate of 10 mV s<sup>-1</sup> under sequentially interrupted backlight AM 1.5G illumination at pH 7 with stepwise addition of mössbauerite.

**Figure S4.** CA at 1.23 V vs. RHE and LSV at 10 mV s<sup>-1</sup> of heterojunction photoanodes under AM 1.5G illumination in 0.1M Na<sub>2</sub>SO<sub>4</sub> (pH 7) with WO<sub>3</sub> synthesized according to ref<sup>1</sup>.

**Figure S5.** Photoelectrochemical impedance spectra of the WO<sub>3</sub> photoanode compared with the heterojunction WO<sub>3</sub>/Mössbauerite photoanode.

**Figure S6.** CA at 1.23 V vs. RHE of bare mössbauerite under sequentially interrupted AM 1.5G illumination in 0.1M Na<sub>2</sub>SO<sub>4</sub> (pH 7).

#### References

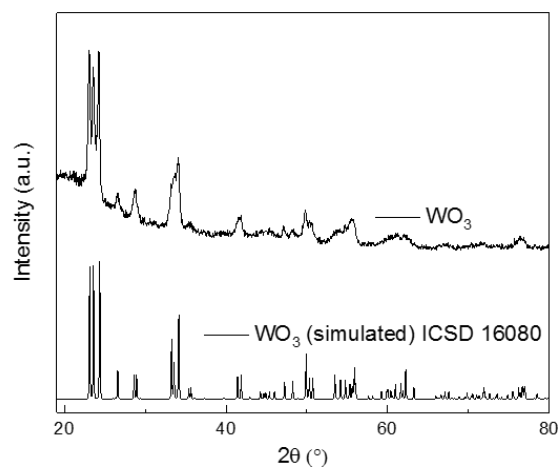

**Figure S1.** Powder X-ray diffraction data of  $\text{WO}_3$ .

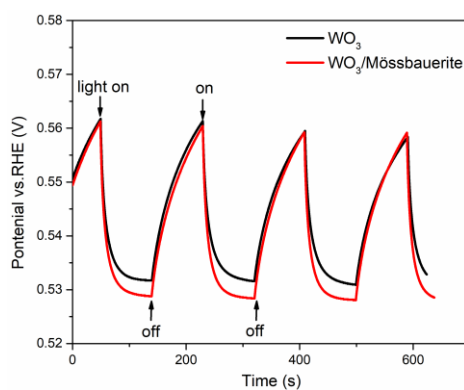

**Figure S2.** Open-circuit photovoltage of  $\text{WO}_3$  and  $\text{WO}_3/\text{Mössbauerite}$  photoanodes upon light on and light off.

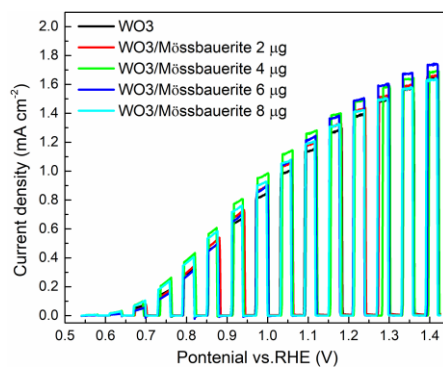

**Figure S3.** LSV at a scan rate of  $10 \text{ mV s}^{-1}$  under sequentially interrupted backlight AM 1.5G illumination at pH 7 with stepwise addition of mössbauerite.

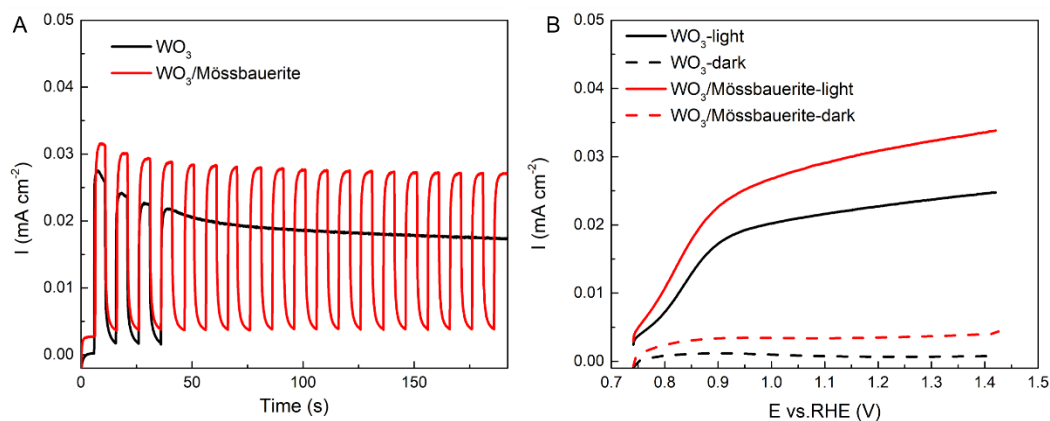

**Figure S4.** CA at 1.23 V vs. RHE and LSV at  $10 \text{ mV s}^{-1}$  of heterojunction photoanodes under AM 1.5G illumination in 0.1M  $\text{Na}_2\text{SO}_4$  (pH 7) with  $\text{WO}_3$  synthesized according to ref<sup>1</sup>.

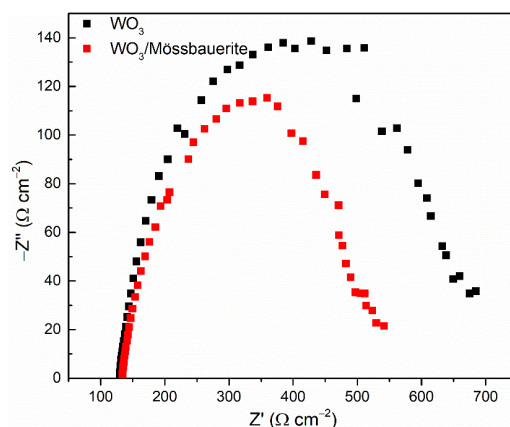

**Figure S5.** Photoelectrochemical impedance spectra of the  $\text{WO}_3$  photoanode compared with the heterojunction  $\text{WO}_3/\text{Mössbauerite}$  photoanode. The EIS was measured at 1.0 V vs RHE in the ac. potential frequency range of 20 KHZ–0.2 Hz under AM 1.5G illumination.

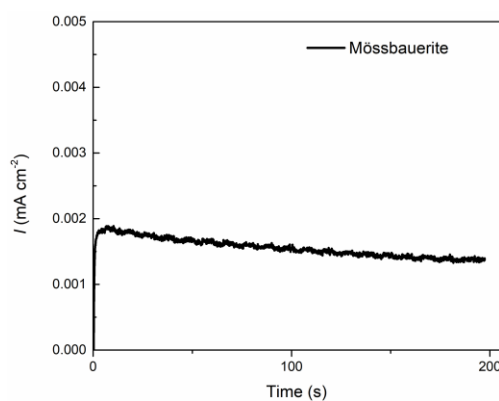

**Figure S6.** CA at 1.23 V vs. RHE of bare mössbauerite under sequentially interrupted AM 1.5G illumination in 0.1M  $\text{Na}_2\text{SO}_4$  (pH 7).

## References

- (1) Davi, M.; Ogutu, G.; Schrader, F.; Rokicinska, A.; Kustrowski, P.; Slabon, A. Enhancing Photoelectrochemical Water Oxidation Efficiency of  $\text{WO}_3/\alpha\text{-Fe}_2\text{O}_3$  Heterojunction Photoanodes by Surface Functionalization with CoPd Nanocrystals. *Eur. J. Inorg. Chem.* **2017**, 2017, 4267–4274.
